# Supplementary material for: Whole Genome Sequencing and Phylogenetic Analysis of Rabies Viruses from Bats in Connecticut, USA, 2018–2019
Source: MDPI journal article supplement (doi:10.3390/v13122500), 2021-12-13
Supplement: s1 [file s1]

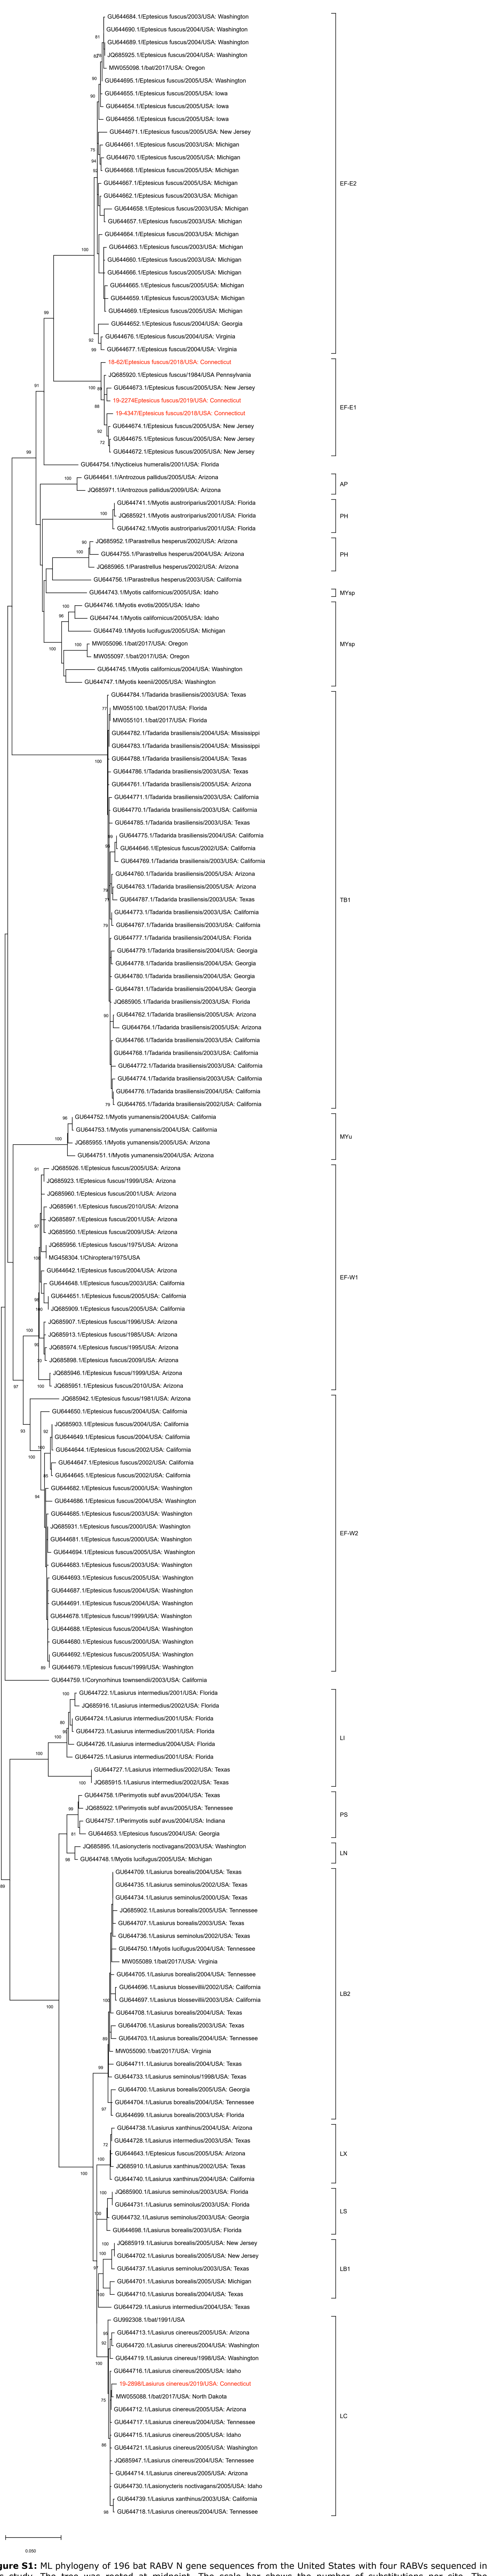

**Figure S1:** ML phylogeny of 196 bat RABV N gene sequences from the United States with four RABVs sequenced in this study. The tree was rooted at midpoint. The scale bar shows the number of substitutions per site. The numerical values represent 1000 bootstrap replicate values expressed as a percentage
