# Supplementary material for: Whole Genome Sequencing and Phylogenetic Analysis of Rabies Viruses from Bats in Connecticut, USA, 2018–2019
Source: MDPI journal article supplement (doi:10.3390/v13122500), 2021-12-13
Supplement: s1 [file s1]

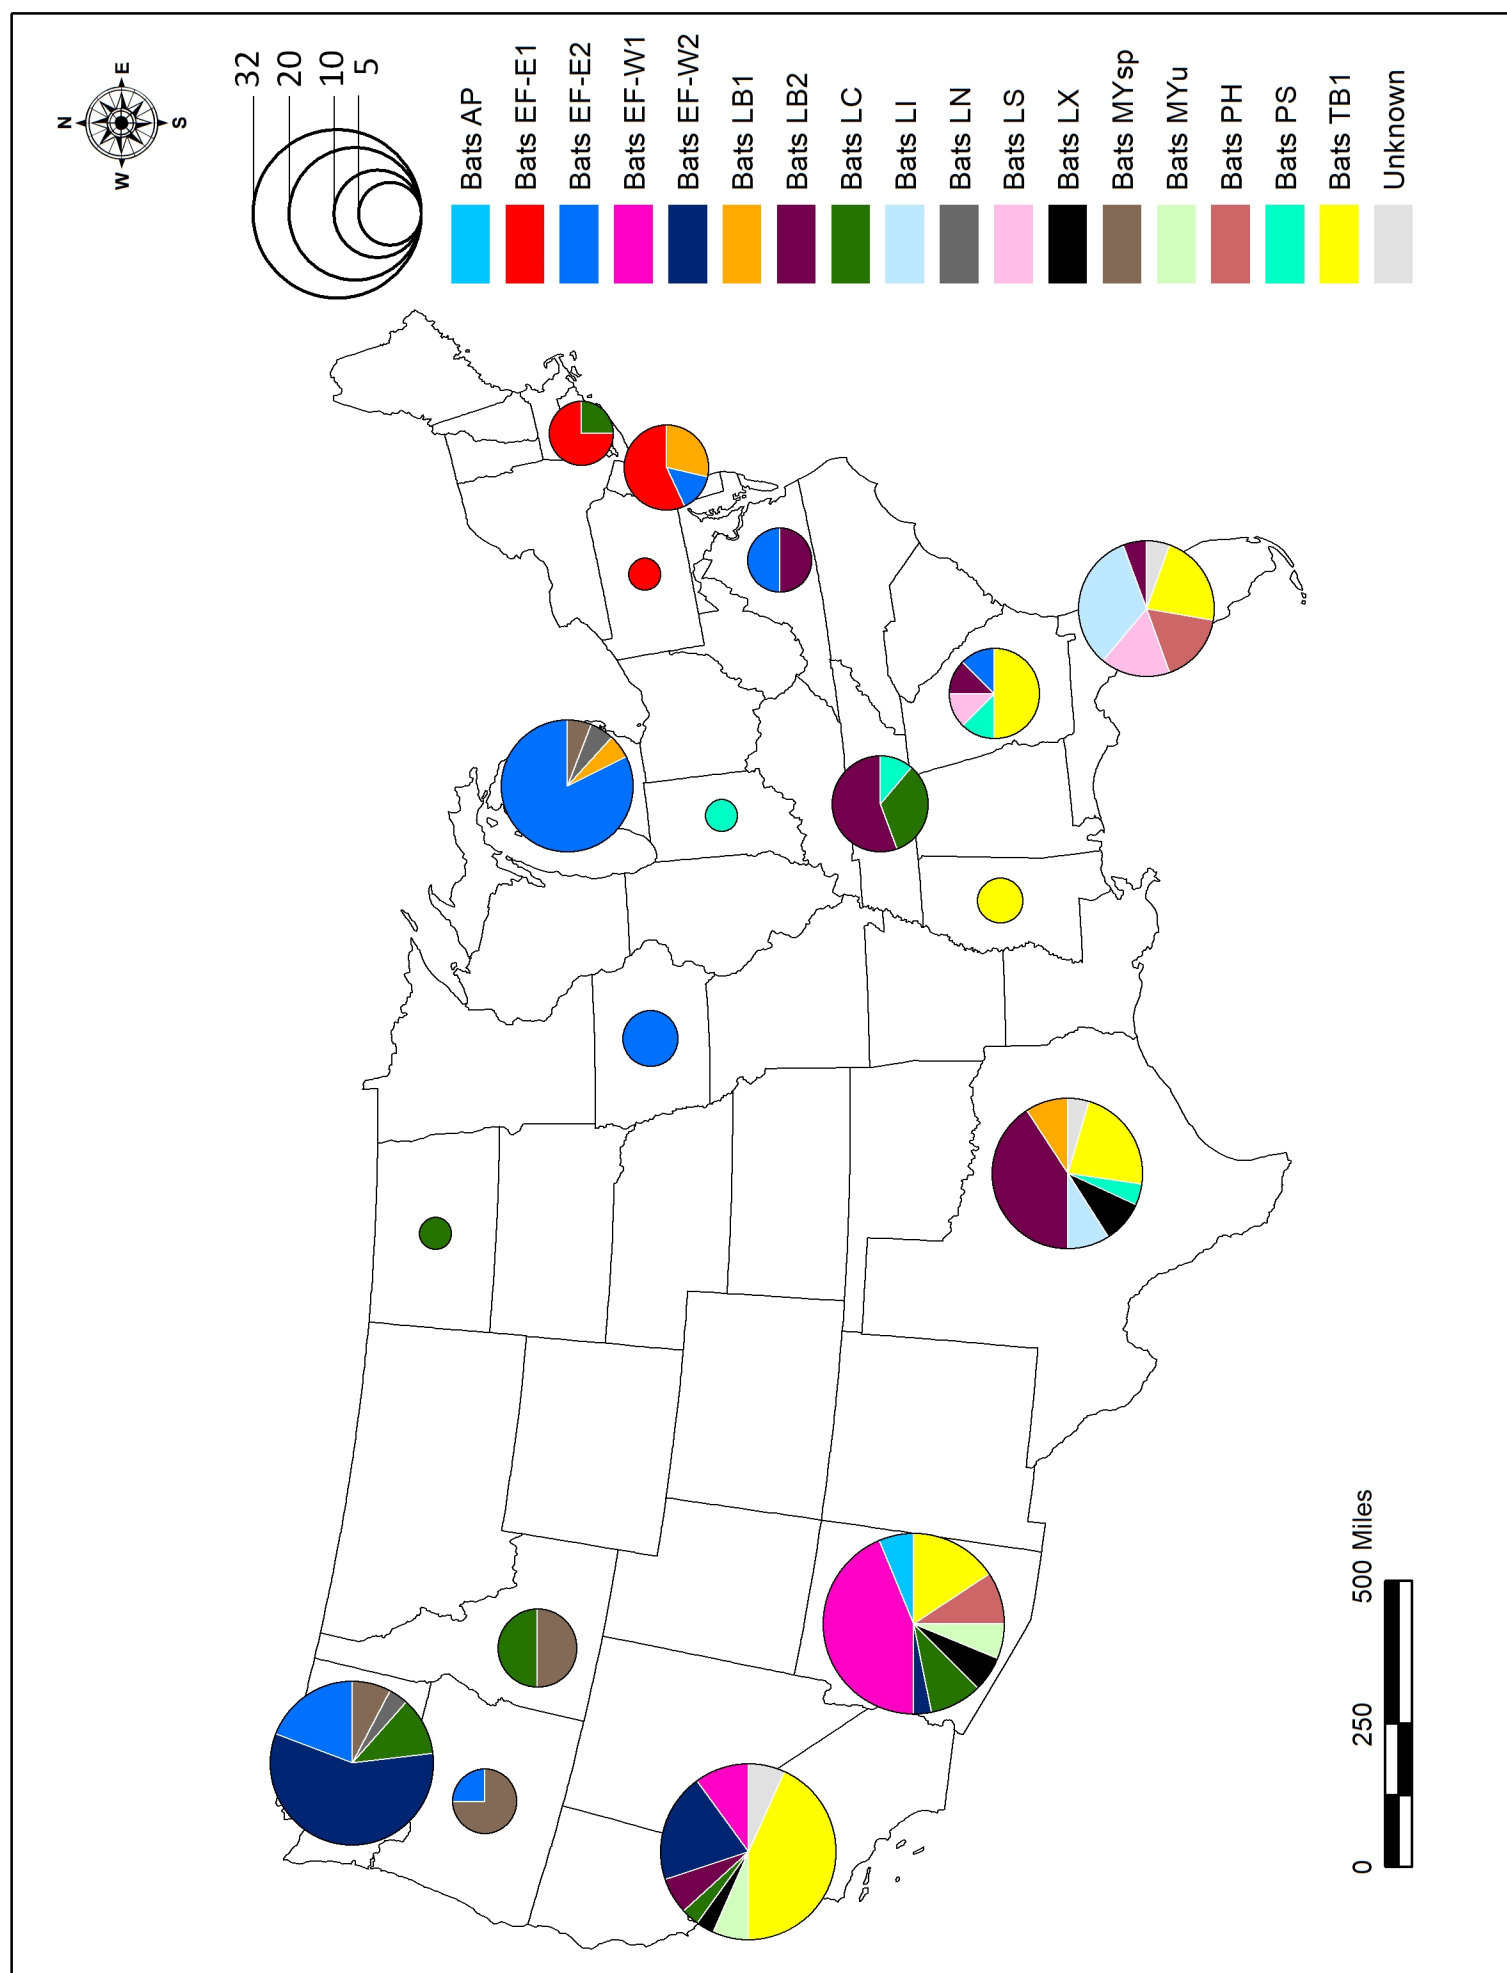

**Figure S2:** Geographic distribution of genetic clades of bat RABVs in the United States, based on N gene sequences available in the GenBank, assigned by RABV-GLUE.
